# Supplementary material
Source: Springer Nature journal article supplement (https://www.springermedizin.de/resource/supplementary/12974_2010_335_MOESM11_ESM.pdf/9601436)

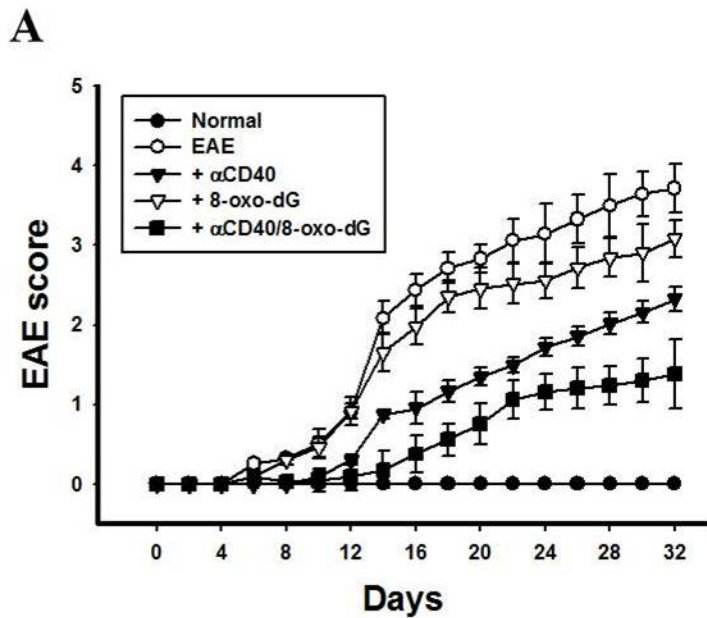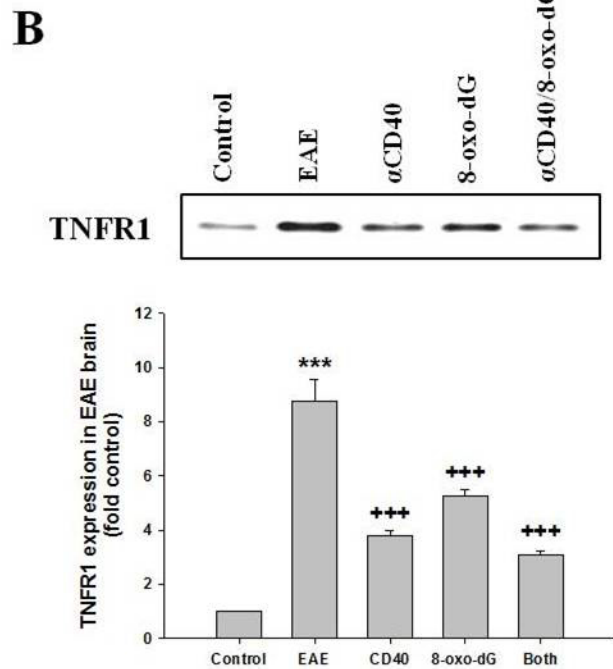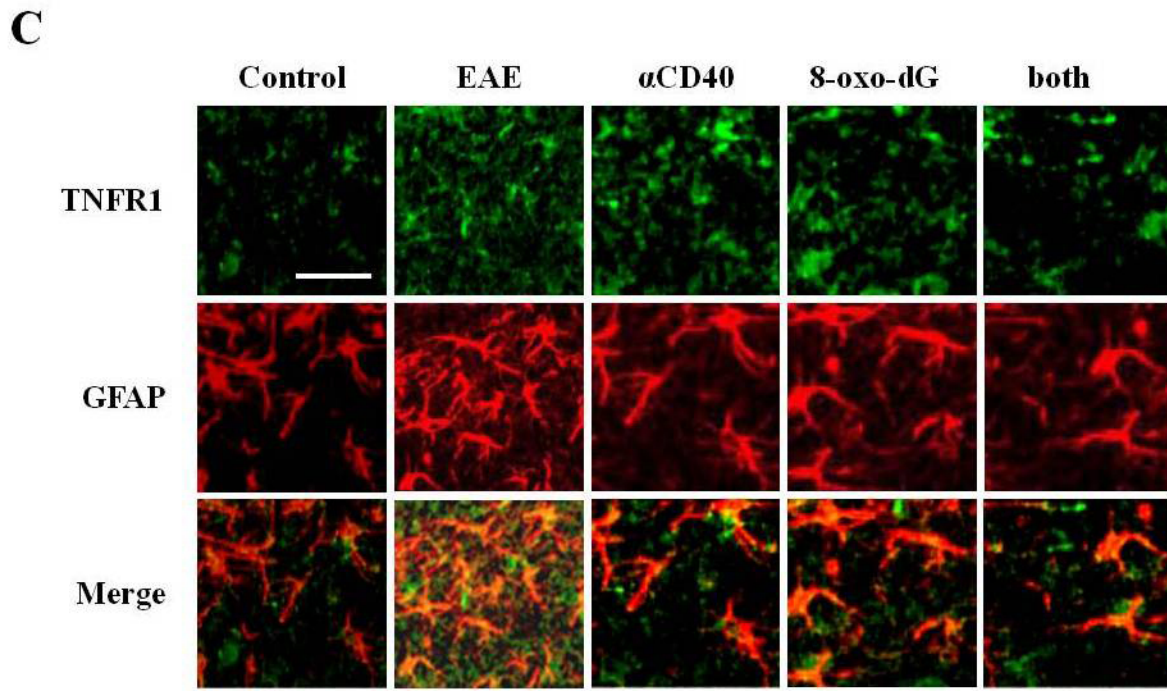

Supplement: MOESM11 [file 9601436]
